# Supplementary material for: Predictors of disease worsening defined by progression of organ damage in diffuse systemic sclerosis: a European Scleroderma Trials and Research (EUSTAR) analysis
Source: PubMed Central journal article supplement (PMC6788922; doi:10.1136/annrheumdis-2019-215145), 2019-06-21
Supplement: annrheumdis-2019-215145supp001.pdf [file annrheumdis-2019-215145supp001.pdf]

## SUPPLEMENTARY APPENDIX

### **Predictors for disease worsening defined by organ failure in diffuse systemic sclerosis: a European scleroderma trials and research (EUSTAR) analysis**

Mike O Becker<sup>1</sup>, Nicole T Graf<sup>2</sup>, Rafael Sauter<sup>3</sup>, Yannick Allanore<sup>4</sup>, John Curram<sup>5</sup>, Christopher P Denton<sup>6</sup>, Dinesh Khanna<sup>7</sup>, Marco Matucci-Cerinic<sup>8</sup>, Janethe de Oliveira Pena<sup>9</sup>, Janet E Pope<sup>10</sup>, Oliver Distler<sup>1</sup>

### **STATISTICAL ANALYSIS**

Selection and elimination of predictor variables ('shrinkage') was conducted using the least absolute shrinkage and selection operator (LASSO) method, a penalised regression approach that performs variable selection through regularisation. The applied LASSO regression was adapted to account for multiple imputation (MI) such that the model selection yielded consistent results, which is not guaranteed if standard LASSO is repeatedly applied to several imputed datasets.(21, 35-37) The MI-LASSO approach is a type of group LASSO regression (38) that has superior model-choice properties compared with stepwise model selection strategies or LASSO regression including complete cases only.(21)

Predictors without face validity and not clinically useful (as judged by the clinical experts) as well as predictors with  $\geq 50\%$  missing values were excluded from the regression model. Two variables with  $\sim 40\%$  missing cases were also excluded to achieve a proportion of  $\geq 25\%$  complete cases (online supplementary table S1), increasing the accuracy of the MI-LASSO analysis. This resulted in 42 remaining predictors (online supplementary table S1). Most of the predictors had few missing cases.

The optimal shrinkage parameter based on the MI-LASSO analysis and the corresponding model with regression coefficients was determined according to the optimal Bayesian information criterion (BIC) model choice criteria as suggested by Chen and Wang (2013) (21).

Bootstrap with 10 000 repetitions was used to validate the logistic model. Missing values were imputed with single conditional mean imputation, as validation of a model with MI data is not possible.

All analyses were performed using SPSS version 20 or R 3.3.32.5 (packages Hmisc, rms, mice, and survival).

## **VARIABLE DEFINITIONS, RECODING AND HANDLING OF OUTLIERS**

Impossible values for disease duration (<0 years) and for body mass index (BMI) (>70 kg/m<sup>2</sup>) were set to missing.

The categories of scleroderma (puffy fingers) were recoded as follows: 0=No / Never; 1= Yes / Current / Previously.

Pericardial effusion was recoded as a binary variable (0=0; >0=1).

Modified skin progression rate was calculated as the ratio of modified Rodnan skin score (mRSS) at baseline to disease duration in months.

Lung fibrosis was defined as fulfilling either of two conditions:

- Forced vital capacity (FVC) <60%
- FVC <70% and presence of lung fibrosis on high-resolution computed tomography

Valentini activity index (VAI) was calculated by totalling the scores of the ten Valentini index items (online supplementary table S3). Patients who scored >3 with the

available items were defined as active. Patients who did not score >3 with the available items, and for whom the missing variables (if positive) would not add up to >3, were defined as inactive. Patients who did not score >3, but for whom the missing items (if positive) could change the activity score to active, were defined as unknown.

mRSS was defined with help of the variable ‘modified Rodnan skin score only imported value’. If this variable had missing values, a sum score of all 17 body parts (‘face’ to ‘left foot’) was calculated, provided that there were at least six valid values including valid values for left and right fingers.

Pulmonary hypertension was defined as present or not present based on assessment of the echocardiogram by the treating physician/cardiologist and was not explicitly based on the systolic pulmonary arterial pressure (measured by echocardiography) or right heart catheterisation values.

Dyspnoea was considered to be significant based on the judgement of the treating physician.

Presence of digital ulcer (DU) was a composite endpoint that was considered positive if either DU (from the minimal essential dataset) or gangrene was present (gangrene was present only in a minority of patients).

Death was all-cause mortality. If the treating physician deems a death SSc-related, there is a box that can be ticked in the database. According to this information, 50/79 deaths (63.3%) that occurred were due to SSc, 29/79 deaths were not due to SSc (36.7%) and for 10/79 deaths (12.7%) there was no information on this.

## CHOOSING PREDICTOR VARIABLES

Patients could be included in the analysis even if they had a prior occurrence of one of the composite endpoints (excluding death), as further progression of disease worsening was still possible.

Selection of predictors focused on clinically relevant variables and those with face validity. In addition, predictors with  $\geq 50\%$  missing values were not considered for inclusion; thus, 44 predictors with  $< 50\%$  missing values for the analysis remained.

As the accuracy of the multiple imputation – least absolute shrinkage and selection operator (MI-LASSO) analysis – decreases as the proportion of incomplete cases increases, the proportion of complete cases was set to  $\geq 25\%$ . To achieve a proportion of complete cases  $\geq 25\%$ , the two predictors with the largest amount of missing data (BMI and anti-RNA-polymerase III positive) were not considered for MI-LASSO, and thus, 42 predictors were retained.

## MISSINGNESS AT RANDOM

For variables with  $> 10\%$  missing data (total lung capacity [TLC], forced expiratory volume after 1 second [FEV<sub>1</sub>], anti-U1RNP positive, hypocomplementaemia, VAI and skin progression rate), an assumption of missingness not at random (MNAR) was explored. TLC correlated best with FEV<sub>1</sub> (online supplementary figure S2). Missingness for TLC was not associated with values for FEV<sub>1</sub> and vice versa, indicating that MNAR is not a likely assumption for TLC or FEV<sub>1</sub> (see online supplementary figure S3 and S4). Anti-U1RNP positive, hypocomplementaemia, VAI and skin progression rate did not correlate well with any of the other variables. Thus, the MNAR assumption could not be explored for these variables.

## NUMBER OF IMPUTATIONS

The MI-LASSO with 100 imputed datasets was applied. It was noted that the number of imputed datasets ( $M$ ) had an effect on the MI-LASSO results. This was probably related to the threshold, which is used to set regression coefficients to a non-zero value.<sup>1</sup> The method of Chen and Wang (2013) was followed and the threshold was set to  $\delta=10e-10$ .<sup>1</sup> The applied stop criterion depended on  $\delta$  and  $M$ , and Chen and Wang (2013) presented results for  $M=5$  imputed datasets only. It was observed that trace plots look different if  $M$  is increased, mainly because  $\lambda$  is rescaled. However, the threshold may also affect the regression coefficients, which were included in the optimal model. A decision was made to redefine the stop criterion in an ad hoc way. After running the MI-LASSO, only regression coefficients with a value of  $>0.006$  at the optimal model (according to the BIC) were included. This adapted rule for the inclusion of regression coefficients led to the same model (same selected regression coefficients) for  $M=5$  and  $M=100$ .

## IMPACT OF PREDICTORS FROM THE FINAL MODEL DURING LONG-TERM OBSERVATION

In order to evaluate the impact of the predictors retained in the final model on survival, we additionally calculated long-term event-free survival curves for patients with systemic sclerosis (SSc) with and without risk factors. Patients with diffuse cutaneous disease, for whom outcome data were available and with a baseline visit in 2009 or later and death or at least one follow-up visit earliest at  $12\pm 3$  months were included. For this analysis, there was no imputation of missing values, but longer observation periods were possible. 'No risk factors' means that none of the following factors was present at baseline: active DU, C-reactive protein (CRP) elevation, significant dyspnoea, lung fibrosis, muscle weakness, pericardial

effusion and proteinuria. Active DU as risk factor, for example, means that active DU was present at baseline, which does not preclude the presence of other risk factors. The online supplementary figures S5A to S5E show the cumulative survival curves, and online supplementary table S4 gives the corresponding median survival times for some risk factors of the final model and their combination(s).

## REFERENCE

1. Chen Q, Wang S. Variable selection for multiply-imputed data with application to dioxin exposure study. *Stat Med* 2013;32:3646–59.

## SUPPLEMENTARY FIGURES AND TABLES

**Supplementary table S1** List of predictors with <50% missing values and percentage of available data for included patients with valid data for the primary endpoint (n=706)

| Predictor                        | Available data (%) |
|----------------------------------|--------------------|
| Demographic                      |                    |
| Sex                              | 100.0              |
| Age, years                       | 100.0              |
| Disease duration, months         | 94.1               |
| Body weight, kg                  | 97.2               |
| BMI, kg/m <sup>2</sup>           | 61.3               |
| Laboratory parameters            |                    |
| ANA positive                     | 98.6               |
| ACA positive                     | 96.3               |
| Anti-Scl70 positive              | 97.5               |
| Anti-U1RNP positive              | 81.3               |
| Anti-RNA-polymerase III positive | 59.6               |
| Creatine kinase elevation        | 95.2               |
| Proteinuria                      | 95.6               |
| Hypocomplementaemia              | 88.1               |
| ESR >20 mm/1h                    | 94.5               |
| CRP elevation                    | 97.0               |
| Vascular                         |                    |
| Raynaud's present                | 100.0              |

---

|                               |      |
|-------------------------------|------|
| DU                            | 98.9 |
| Active DU                     | 98.7 |
| Scleroderma (puffy fingers)   | 97.2 |
| Musculoskeletal               |      |
| Tendon friction rubs          | 98.3 |
| Joint synovitis               | 99.3 |
| Joint contractures            | 98.9 |
| Muscle weakness               | 99.3 |
| Cardiopulmonary               |      |
| Pericardial effusion          | 92.5 |
| Pulmonary hypertension        | 98.0 |
| Conduction blocks             | 94.2 |
| Abnormal diastolic function   | 96.2 |
| Lung fibrosis                 | 94.3 |
| Arterial hypertension         | 99.6 |
| Dyspnoea                      | 97.7 |
| DLCO, %predicted              | 94.1 |
| FVC, %predicted               | 96.5 |
| FEV <sub>1</sub> , %predicted | 78.3 |
| TLC, %predicted               | 66.1 |
| LVEF, %predicted              | 96.5 |

---



---

|                                                           |      |
|-----------------------------------------------------------|------|
| Gastrointestinal                                          |      |
| Oesophageal symptoms                                      | 99.9 |
| Stomach symptoms                                          | 99.3 |
| Intestinal symptoms                                       | 99.3 |
| Kidney                                                    |      |
| Renal crisis                                              | 99.4 |
| Skin                                                      |      |
| mRSS                                                      | 93.2 |
| Worsening of skin changes within the last month           | 98.3 |
| Worsening of finger vascularisation within the last month | 98.3 |
| Skin progression rate                                     | 88.2 |
| Multiorgan                                                |      |
| VAI* >3                                                   | 88.1 |

---

\*VAI is a measure of disease activity in SSc.

To achieve a proportion of complete cases  $\geq 25\%$ , two predictors with the largest amount of missing data (body mass index and anti-RNA-polymerase III positive) were not considered for MI-LASSO. ACA, anti-centromere antibody; ANA, anti-nuclear antibody; BMI, body mass index; CRP, C-reactive protein; DLCO, diffusion capacity of the lung for carbon monoxide; DU, digital ulcer; ESR, erythrocyte sedimentation rate; FEV<sub>1</sub>, forced expiratory volume after 1 second; FVC, forced vital capacity; LVEF, left ventricular ejection fraction; MI-LASSO, multiple imputation – least absolute shrinkage and selection operator; mRSS, modified Rodnan skin score; TLC, total lung capacity; VAI, Valentini activity index.

**Supplementary table S2** Comparison of patients with and without missing data on the outcome

| <b>Demographics and baseline characteristics</b> | <b>Patients without missing data on outcome<br/>(n=706)</b> | <b>Patients with missing data on outcome<br/>(n=745)</b> |
|--------------------------------------------------|-------------------------------------------------------------|----------------------------------------------------------|
| <b>Demographic</b>                               |                                                             |                                                          |
| Male sex                                         | 172 (24.4)                                                  | 174 (23.4)                                               |
| Age, years (mean±SD)                             | 52.9±12.9                                                   | 51.9±14.1                                                |
| Disease duration, months<br>(mean±SD)            | 101.1±94.0                                                  | 94.5(±79.8)                                              |
| Bodyweight,<br>mean±SD                           | 64.6±13.4                                                   | 67.3±15.3                                                |
| <b>Laboratory parameters</b>                     |                                                             |                                                          |
| ANA positive                                     | 657 (94.4)                                                  | 631 (94.9)                                               |
| ACA positive                                     | 48 (7.1)                                                    | 58 (9.6)                                                 |
| Anti-Scl70 positive                              | 414 (60.2)                                                  | 372 (59.9)                                               |
| Anti-U1RNP positive                              | 27 (4.7)                                                    | 25 (5.7)                                                 |
| CK elevation                                     | 64 (9.5)                                                    | 68 (11.5)                                                |
| Proteinuria                                      | 57 (8.4)                                                    | 60 (10.2)                                                |
| Hypocomplementaemia                              | 39 (6.3)                                                    | 38 (8.2)                                                 |
| ESR >20 mm/1h,<br>mean±SD                        | 25.3±20.6                                                   | 24.5 (19.4)                                              |
| CRP elevation                                    | 190 (27.7)                                                  | 184 (30.7)                                               |
| <b>Vascular</b>                                  |                                                             |                                                          |

|                                         |            |            |
|-----------------------------------------|------------|------------|
| Raynaud's present                       | 683 (96.7) | 703 (97.0) |
| DU                                      | 266 (38.1) | 247 (35.8) |
| Active DU                               | 126 (18.1) | 123 (18.6) |
| Scleroderma (puffy fingers)             | 303 (44.2) | 342 (53.2) |
| Musculoskeletal                         |            |            |
| Tendon friction rubs                    | 89 (12.8)  | 87 (12.8)  |
| Joint synovitis                         | 108 (15.4) | 109 (15.9) |
| Joint contractures                      | 310 (44.4) | 323 (47.2) |
| Muscle weakness                         | 164 (23.4) | 167 (24.6) |
| Cardiopulmonary                         |            |            |
| Pericardial effusion                    | 58 (8.9)   | 39 (8.7)   |
| Echocardiography suspected PH           | 113 (16.3) | 73 (14.1)  |
| Conduction blocks                       | 104 (15.6) | 73 (12.8)  |
| Abnormal diastolic function             | 170 (25.0) | 106 (21.0) |
| Lung fibrosis                           | 131 (19.7) | 75 (17.4)  |
| Arterial hypertension                   | 154 (21.9) | 166 (23.9) |
| Dyspnoea                                | 91 (13.2)  | 83 (14.1)  |
| DLCO, %predicted (mean±SD)              | 64.1±20.2  | 63.1±19.7  |
| FVC <sub>1</sub> , %predicted (mean±SD) | 86.4±21.3  | 86.4±20.9  |

|                                                                 |            |            |
|-----------------------------------------------------------------|------------|------------|
| FEV <sub>1</sub> , %predicted<br>(mean±SD)                      | 85.0±18.7  | 85.1±19.5  |
| TLC, %predicted<br>(mean±SD)                                    | 84.2±19.9  | 88.7±20.6  |
| LVEF, %predicted<br>(mean±SD)                                   | 61.7±7.0   | 60.4±8.3   |
| Gastrointestinal                                                |            |            |
| Oesophageal symptoms                                            | 455 (64.5) | 462 (64.1) |
| Stomach symptoms                                                | 192 (27.4) | 176 (25.3) |
| Intestinal symptoms                                             | 177 (25.2) | 208 (29.7) |
| Kidney                                                          |            |            |
| Renal crisis                                                    | 34 (4.8)   | 20 (2.9)   |
| Skin                                                            |            |            |
| mRSS, mean±SD                                                   | 14.2±9.1   | 13.9±8.7   |
| Worsening of skin changes<br>within the last month              | 141 (20.3) | 167 (24.5) |
| Worsening of finger<br>vascularisation within the<br>last month | 162 (23.3) | 187 (27.7) |
| Skin progression rate,<br>mean±SD                               | 0.6±1.6    | 0.5±1.4    |
| Disease activity                                                |            |            |
| VAI* >3                                                         | 191 (30.7) | 177 (35.5) |

Data are expressed as n (%) unless otherwise stated.

\*VAI is a measure of disease activity in SSc.

ANA, anti-nuclear antibody; ACA, anti-centromere antibody; CRP, C-reactive protein; ESR, erythrocyte sedimentation rate; DLCO, diffusion capacity of the lung for carbon monoxide; DU, digital ulcer; FEV<sub>1</sub>, forced expiratory volume after 1 second; FVC, forced vital capacity; LVEF, left ventricular ejection fraction; MI-LASSO, multiple imputation – least absolute shrinkage and selection operator; mRSS, modified Rodnan skin score; PH, pulmonary hypertension; SSc, systemic sclerosis; TLC, total lung capacity; VAI, Valentini activity index.

---

**Supplementary table S3** Definition of Valentini activity index (VAI) for systemic sclerosis

---

| <b>Variable</b>                                                   | <b>Score</b> |
|-------------------------------------------------------------------|--------------|
| mRSS >14                                                          | 1.0          |
| Scleroderma (puffy fingers) = Yes / Current                       | 0.5          |
| Worsening of skin within the last month                           | 2.0          |
| Digital necrosis (gangrene)                                       | 0.5          |
| Worsening of finger vascularisation within the last month         | 0.5          |
| Joint synovitis                                                   | 0.5          |
| DLCO <80% predicted                                               | 0.5          |
| Worsening of cardiopulmonary manifestations within the last month | 2.0          |
| ESR >30 mm/h                                                      | 1.5          |
| Hypocomplementaemia                                               | 1.0          |
| Maximum disease activity index score                              | 10.0         |

---

DLCO, diffusion capacity of the lung for carbon monoxide; ESR, erythrocyte sedimentation rate; mRSS, modified Rodnan skin score.

**Supplementary table S4** Impact of predictors retained in the final model on long-term survival

| <b>Risk factor</b>           | <b>Number of patients<br/>with data<br/>(of which had an<br/>event)</b> | <b>Median survival<br/>time<br/>(years)</b> | <b>95% CI (years)</b> |
|------------------------------|-------------------------------------------------------------------------|---------------------------------------------|-----------------------|
| <b>Active DU*</b>            |                                                                         |                                             |                       |
| No active DU                 | 645                                                                     | 4.48                                        | 3.70–4.97             |
| Active DU                    | (245)                                                                   | 2.38                                        | 1.97–2.96             |
| Corresponds to<br>Figure S5A |                                                                         |                                             |                       |
| <b>CRP elevation*</b>        |                                                                         |                                             |                       |
| No CRP elevation             | 765                                                                     | 4.48                                        | 3.7–4.97              |
| CRP elevation                | (365)                                                                   | 2.20                                        | 1.9–2.51              |
| Corresponds to<br>Figure S5B |                                                                         |                                             |                       |
| <b>Lung fibrosis*</b>        |                                                                         |                                             |                       |
| No lung fibrosis             | 629                                                                     | 4.48                                        | 3.70–4.97             |
| Lung fibrosis                | (229)                                                                   | 2.00                                        | 1.74–2.32             |
| Corresponds to<br>figure S5C |                                                                         |                                             |                       |
| <b>Muscle weakness*</b>      |                                                                         |                                             |                       |
| No muscle weakness           | 734                                                                     | 4.48                                        | 3.70–4.97             |
| Muscle weakness              | (334)                                                                   | 2.33                                        | 2.03–2.75             |

|                     |      |      |           |
|---------------------|------|------|-----------|
| Corresponds to      |      |      |           |
| figure S5D          |      |      |           |
| Active DU, CRP      |      |      |           |
| elevation, lung     | 411  |      |           |
| fibrosis and muscle | (11) |      |           |
| weakness*           |      | 4.48 | 3.70–4.97 |
| None of the above   |      | 1.13 | 0.32–1.74 |
| All of the above    |      |      |           |
| Corresponds to      |      |      |           |
| figure S5E          |      |      |           |
| CRP elevation and   |      |      |           |
| lung fibrosis*      |      |      |           |
| None of the above   | 492  | 4.48 | 3.70–4.97 |
| Both of the above   | (92) | 1.53 | 1.13–1.99 |
| Corresponds to      |      |      |           |
| figure 2A           |      |      |           |
| CRP elevation and   |      |      |           |
| active DU*          |      |      |           |
| None of the above   | 493  | 4.48 | 3.70–4.97 |
| Both of the above   | (93) | 1.82 | 1.23–2.47 |
| Corresponds to      |      |      |           |
| figure 2B           |      |      |           |

---



For each risk factor (or a combination), the median survival time of patients with and without this risk factor (or combination thereof) have been calculated. The data correspond to figure 2 in the main text and online supplementary figure S5. \*=p<0.001 by log-rank test.

CI, confidence interval; CRP, C-reactive protein; DU, digital ulcer

**Supplementary figure S1.** Calibration curve of final model after bootstrapping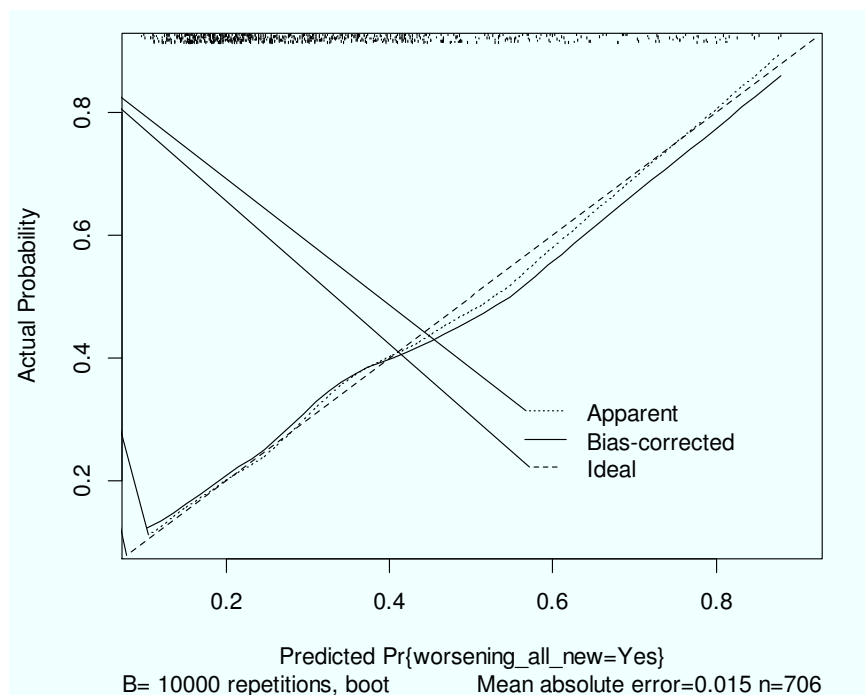

The plot shows observed responses against predicted responses. When a dataset is used to fit a regression model, the slope of observed versus predicted values is forced to be 1 ('apparent'). However, when the model is applied to a different dataset, overfitting will cause the slope of the calibration plot to be  $<1$  ('bias-corrected'). For our model, the slope shrinkage factor (which is not to be confused with the shrinkage factor of the actual MI-LASSO regression analysis) was 0.926, and the maximum absolute error in predicted probability was only 0.026. Thus, the final model shows only minor overfitting.

**Supplementary figure S2** Scatterplot between FEV<sub>1</sub> and TLC (Pearson correlation,  $r=0.616$ )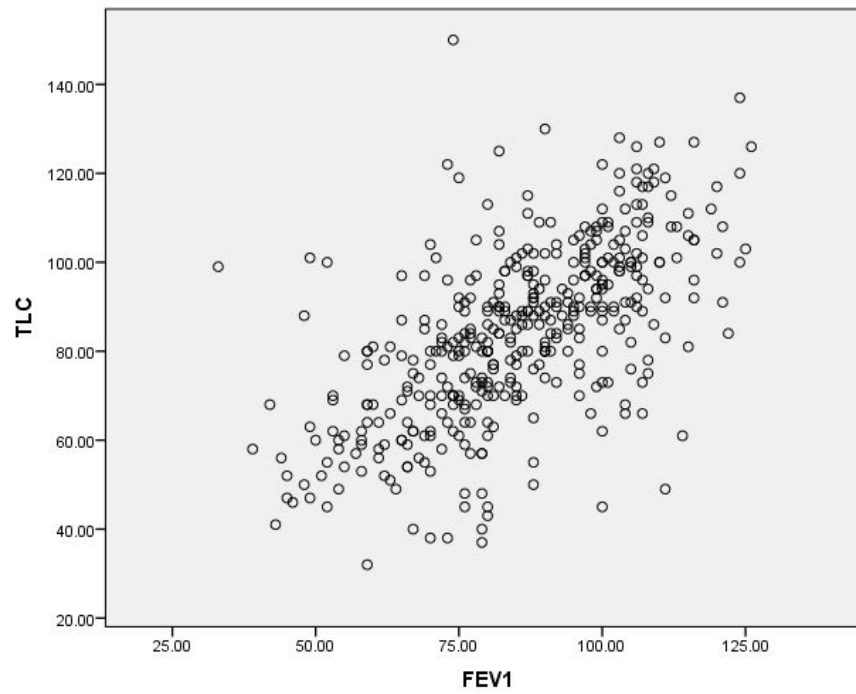

**Supplementary figure S3** Boxplot for FEV<sub>1</sub> stratified for patients with (n=139) and without (n=414) missing data on TLC. A two-samples t-test did not indicate a difference in means (p=0.510)

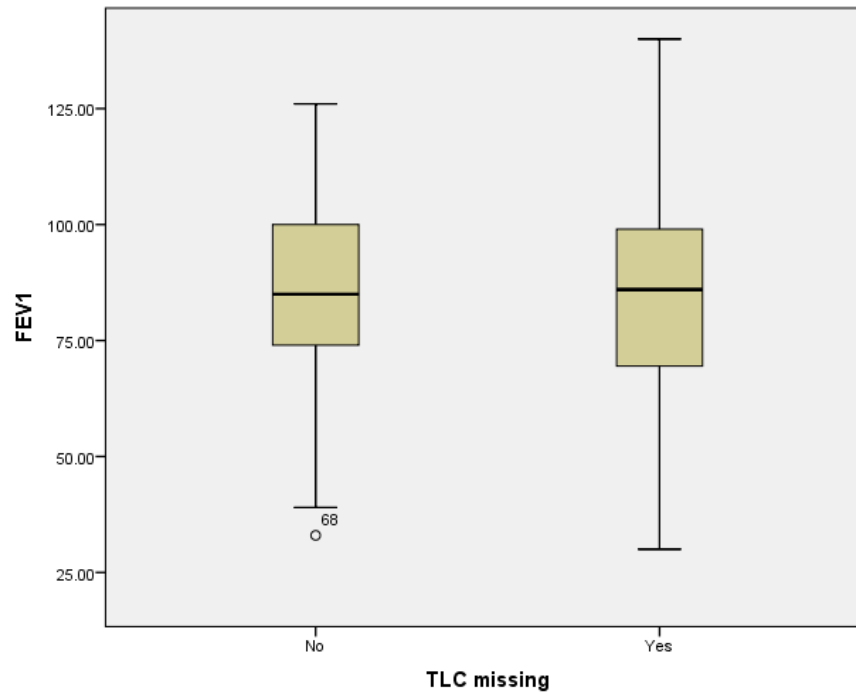

**Supplementary figure S4** Boxplot for TLC stratified for patients with (n=53) and without (n=414) missing data on FEV<sub>1</sub>. A two-sample t-test did not indicate a difference in means (p=0.760)

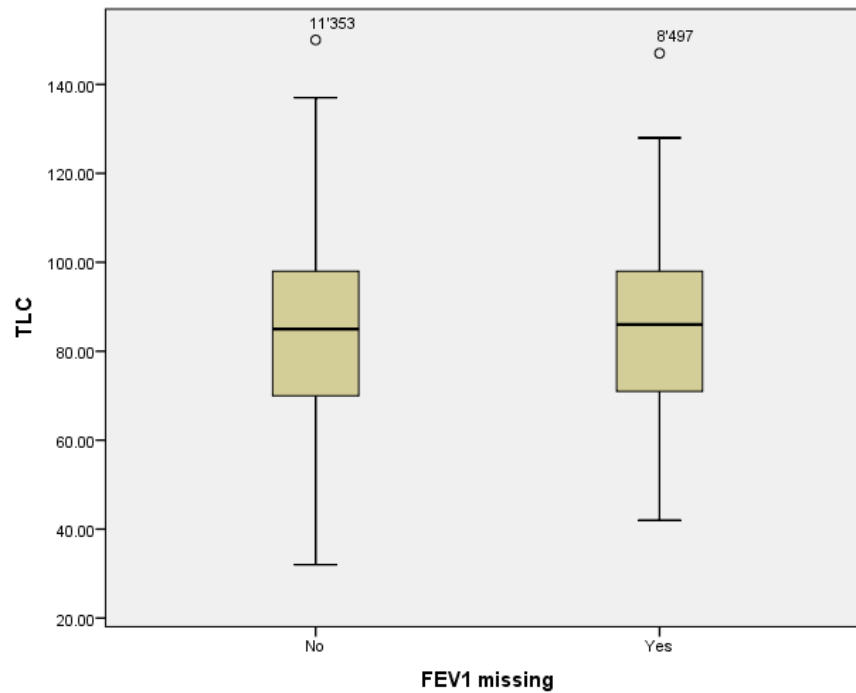

**Supplementary figure S5** Event-free survival of patients with SSc fulfilling the inclusion criteria (diffuse cutaneous SSc, death or at least one follow-up visit earliest at  $12\pm 3$  months after baseline visit in 2009 or later) with risk factors (active DU – S5A; elevated CRP – S5B, presence of lung fibrosis – S5C, or muscle weakness – S5D; or their combination, S5E) versus no risk factors. The log-rank test was significant for all comparisons ( $p < 0.001$ )

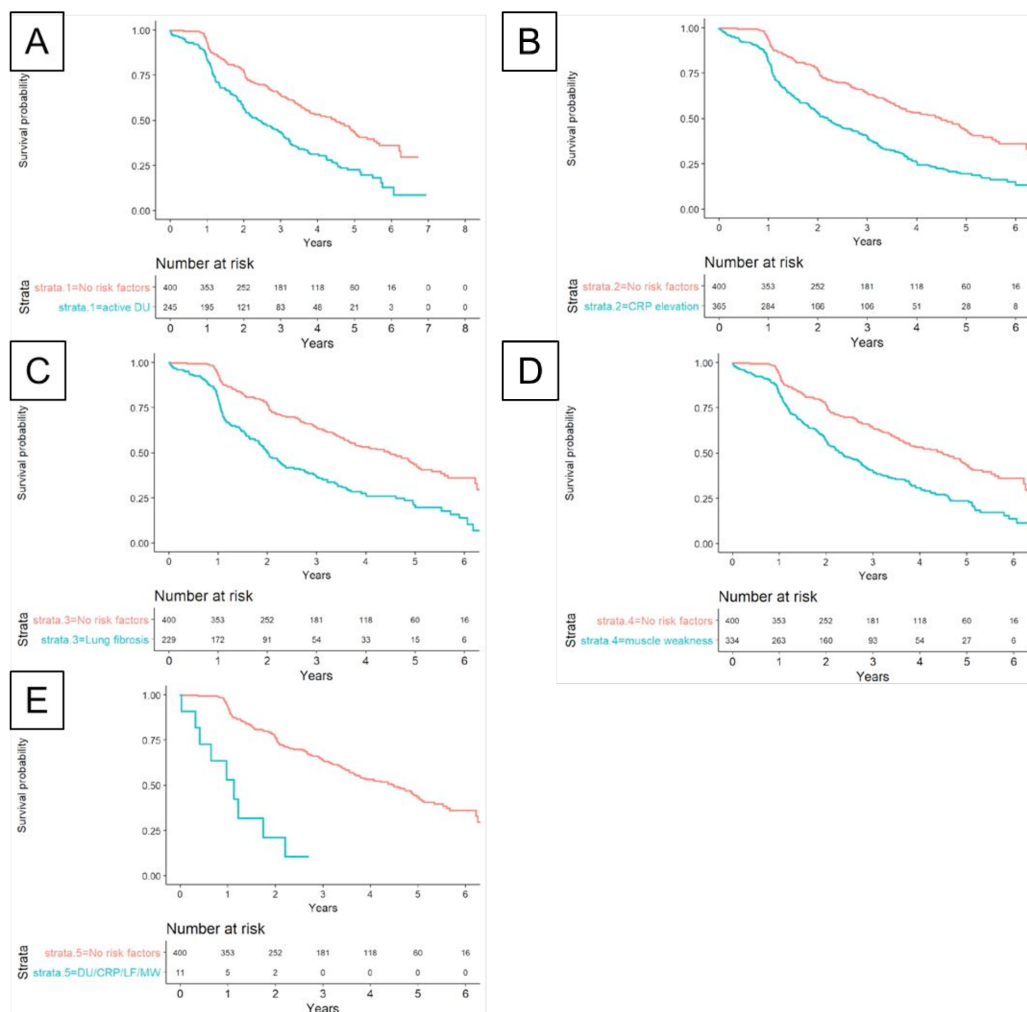

CRP, C-reactive protein; LF, lung fibrosis; DU, digital ulcer; MW, muscle weakness; SSc, systemic sclerosis.
